# Supplementary material for: Quality Evaluation of Bergamot Fruits Produced in Different Areas of Calabria Region
Source: Preprints.org preprint supplement (doi:10.20944/preprints202405.1522.v1), 2024-05-23
Supplement: Supplementary file 1 [file supplementary]

**Table S1.** Data comparison of physicochemical changes in the two different years.

| **Area** | **Year** | **Month** | **SST (°Brix)** | **pH** | **Juice Yeld (%)** | **TA (g L-1 Citric ac. m)** | **Ascorbic Ac. (g L-1)** | **Citric Ac. (g L-1)** |
| --- | --- | --- | --- | --- | --- | --- | --- | --- |
| **F-M** | I | Dic | 10.36±0.13 | 2.52±0.09 | 50.33±4.36 | 49.28±1.07 | 0.57±0.04 | 46.44±2.64 |
| II | Jan | 11.28±0.13 | 2.35±0.02 | 42.02±2.68 | 55.37±1.86 | 0.59±0.02 | 47.96±1.08 |
| **Sign** |  |  | ** | ** | * | ** | n.s. | n.s. |
| **F-M** | I | Dic | 10.24±0.19 | 2.57±0.07 | 54.51±1.94 | 48.58±1.21 | 0.61±0.07 | 49.13±3.14 |
| II | Jan | 11.04±0.53 | 2.62±0.08 | 48.88±3.46 | 49.04±0.55 | 0.48±0.06 | 47.46±2.2 |
| **Sign** |  |  | * | n.s. | * | n.s. | * | n.s. |
| **F-R** | I | Dic | 8.84±0.54 | 2.59±0.06 | 35.86±4.74 | 43.65±1.78 | 0.43±0.07 | 38.87±3.24 |
| II | Jan | 8.74±0.25 | 2.57±0.06 | 38.3±2.19 | 50.09±1.48 | 0.42±0.02 | 47.25±2.98 |
| **Sign** |  |  | n.s. | n.s. | n.s. | ** | n.s. | ** |
| **F-R** | I | Dic | 7.7±0.21 | 2.61±0.1 | 36.36±3.02 | 41.23±1.11 | 0.48±0.02 | 40.35±2.04 |
| II | Jan | 7.58±0.18 | 2.48±0.02 | 43.26±2.35 | 42.56±3.06 | 0.32±0.04 | 44.8±2.54 |
| **Sign** |  |  | n.s. | * | ** | n.s. | n.s. | * |

**Table S2.** Main polyphenols in BJ: comparison over the two years.

| **Area** | **Year** | **Month** | ***p*-coumaric Ac.** | **Ferulic Ac.** | **Eriocitrin** | **Neoeriocitrin** | **Narirutin** | **Naringin** | **Neosperidin** | **Melitidin** | **Brutieridin** | **Total Polyphenols** |
| --- | --- | --- | --- | --- | --- | --- | --- | --- | --- | --- | --- | --- |
| **F-M** | I | Dic | 1.02 ± 0.02 | 0.98 ± 0.18 | 0.57 ± 0.05 | 9.62 ± 0.83 | 0.22 ± 0.05 | 9.69 ± 1.55 | 9.12 ± 2 | 3.99 ± 0.72 | 21.74 ± 2.2 | 56.95 ± 6.01 |
| II | 1.42 ± 0.08 | 1.29 ± 0.14 | 1.27 ± 0.08 | 9.87 ± 0.34 | 1.21 ± 0.02 | 13.44 ± 0.6 | 11.93 ± 0.6 | 8.26 ± 0.47 | 23.05 ± 0.66 | 71.75 ± 2.58 |
| **Sign** |  |  | ** | * | ** | n.s. | ** | * | n.s. | ** | n.s. | * |
| **F-M** | I | Jan | 1.09 ± 0.01 | 0.98 ± 0.14 | 0.68 ± 0.06 | 10.89 ± 0.68 | 0.37 ± 0.01 | 12.49 ± 1.25 | 8.92 ± 1.2 | 5.09 ± 0.83 | 24.53 ± 0.69 | 65.04 ± 3.53 |
|  | II |  | 1.22 ± 0.1 | 1.06 ± 0.13 | 1.24 ± 0.02 | 11.07 ± 1.61 | 1.26 ± 0.45 | 13.88 ± 0.99 | 12.11 ± 1.92 | 8.55 ± 1.06 | 22.19 ± 2.38 | 72.59 ± 8.47 |
| **Sign** |  |  | n.s. | n.s. | ** | n.s. | ** | n.s. | * | ** | n.s. | n.s. |
| **F-R** | I | Dic | 0.83 ± 0.03 | 0.78 ± 0.09 | 0.6 ± 0.15 | 9.13 ± 0.38 | 0.22 ± 0.05 | 6.66 ± 0.85 | 4.1 ± 1 | 2.05 ± 0.77 | 9.56 ± 2.85 | 33.93 ± 4.93 |
| II | 1.14 ± 0.08 | 0.88 ± 0.06 | 0.74 ± 0.04 | 8.59 ± 0.55 | 0.85 ± 0.12 | 7.35 ± 0.26 | 5.04 ± 0.41 | 4.67 ± 0.35 | 10.97 ± 0.72 | 40.23 ± 1.98 |
| **Sign** |  |  | ** | n.s. | n.s. | n.s. | ** | n.s. | n.s. | ** | n.s. | n.s. |
| **F-R** | I | Jan | 0.73 ± 0.13 | 0.66 ± 0.1 | 0.56 ± 0.09 | 12.15 ± 1.88 | 0.15 ± 0.03 | 8.49 ± 1.83 | 5.15 ± 1.22 | 2.14 ± 0.39 | 8.56 ± 1.28 | 38.6 ± 6.5 |
| II | 0.75 ± 0.09 | 0.61 ± 0.09 | 0.62 ± 0.09 | 9.37 ± 1.25 | 0.76 ± 0.07 | 6.45 ± 1 | 4.07 ± 0.64 | 3.48 ± 0.25 | 7.21 ± 0.43 | 33.31 ± 3.05 |
| **Sign** |  |  | n.s. | n.s. | n.s. | n.s. | ** | n.s. | n.s. | ** | n.s. | n.s. |

* Results are expressed as mg 100 mL-1 of juice
